# Supplementary material for: The Cys-Arg/N-End Rule Pathway Is a General Sensor of Abiotic Stress in Flowering Plants
Source: PubMed Central journal article supplement (PMC5668231; doi:10.1016/j.cub.2017.09.006), 2017-10-23
Supplement: mmc1.pdf [file mmc1.pdf]

**Current Biology, Volume 27**

**Supplemental Information**

**The Cys-Arg/N-End Rule Pathway Is a General  
Sensor of Abiotic Stress in Flowering Plants**

**Jorge Vicente, Guillermina M. Mendiando, Mahsa Movahedi, Marta Peirats-Llobet, Yu-ting Juan, Yu-yen Shen, Charlene Dambire, Katherine Smart, Pedro L. Rodriguez, Yee-yung Charng, Julie E. Gray, and Michael J. Holdsworth**

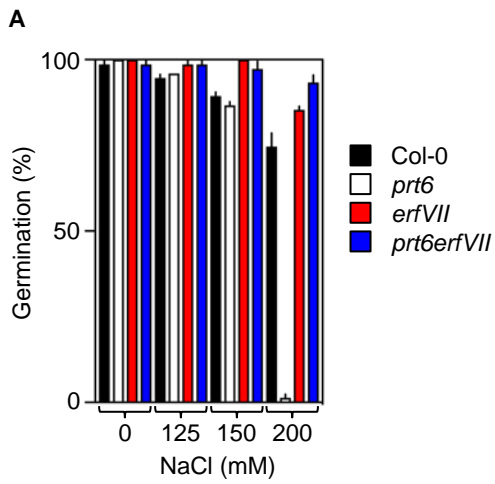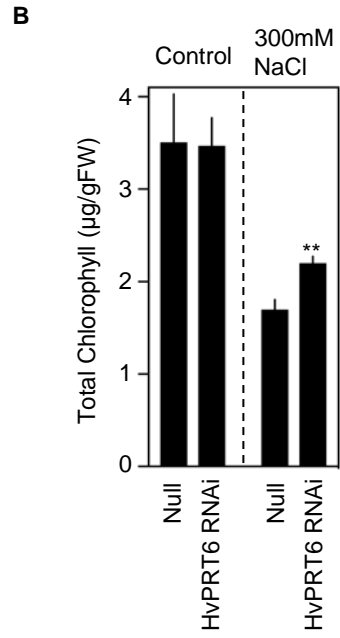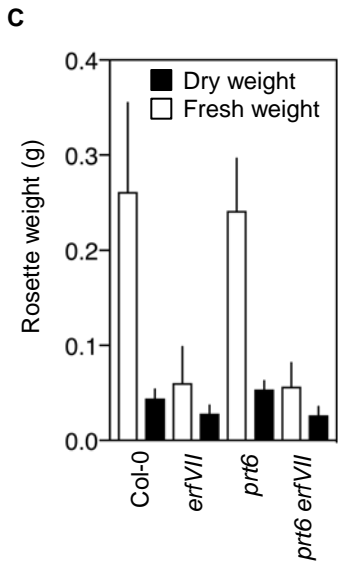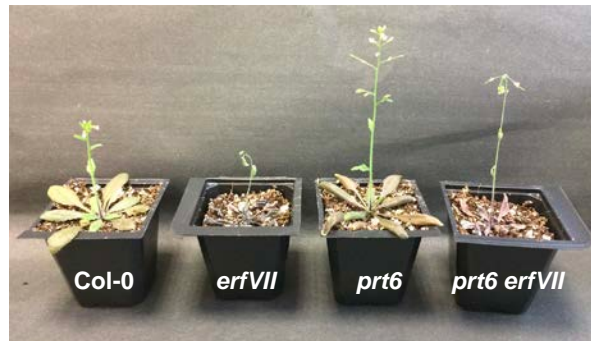

*prt6* and *erfVII*- dependent response to 10 days water deprivation. Images and weights of droughted plants are shown.

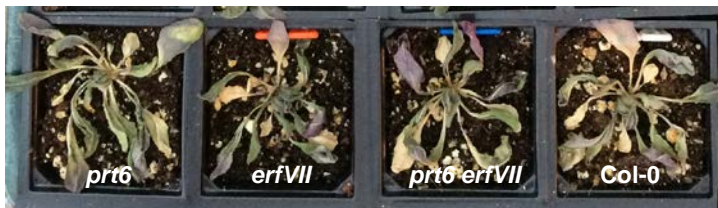

No genotype-specific response to 10 days water deprivation

D

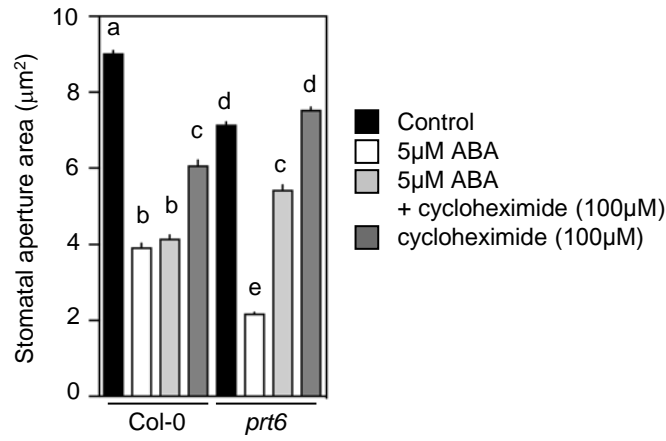

E

Overexpression of (W385A)*hab1* or inactivation of SnRKs does not abolish ABA hypersensitivity of *prt6*

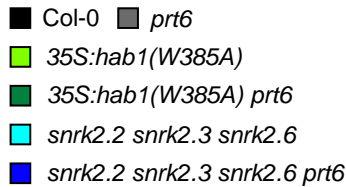

The dominant PP2C mutant *abi1-1* does not abolish ABA hypersensitivity of *prt6*

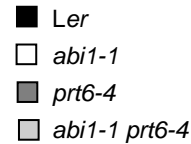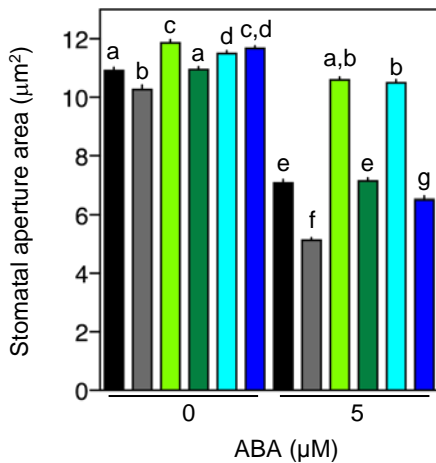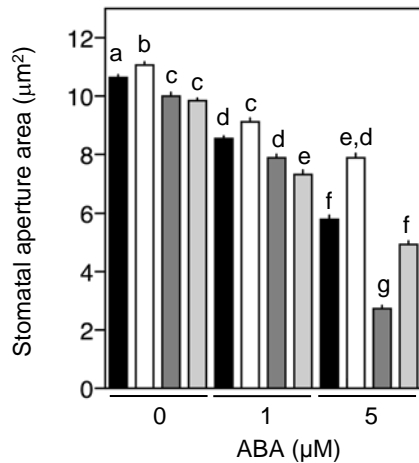

Figure S1, Related to Figure 1.

**A. Sensitivity of germination to NaCl is controlled by N-end rule regulation of ERFVIs in Arabidopsis. B. Chlorophyll content of barley plants in response to watering with 300mM NaCl. C. Inconsistent response of Arabidopsis N-end rule mutants to drought treatment.** Two representative experiments are shown, where *prt6* and *erfVII-* dependent response to water deprivation were observed or not observed. The reason for this inconsistency has not been determined. **D. Stomatal ABA hypersensitivity of *prt6* requires protein synthesis. E. Stomatal ABA hypersensitivity of *prt6* is not regulated through the core PYR/PYL-PP2C-SnRK ABA transduction pathway**

Error bars indicate SEM, \*\* =  $p < 0.01$ , letters one-way ANOVA, Tukey's test.

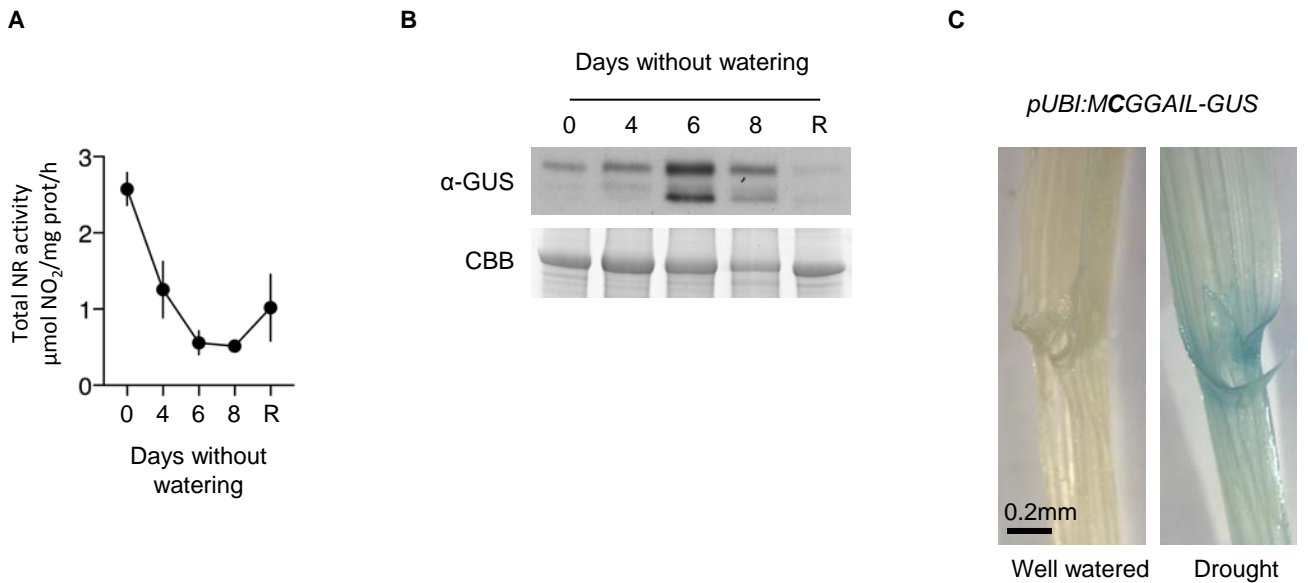

**Figure S2, Related to Figure 2.**

**A. Nitrate reductase activity in barley in response to drought stress.** R = Recovery; 3 days watered after drought. **B. Western blot analysis of MCGGAIL-GUS in barley in response to drought stress.** R = Recovery; 3 days watered after drought. **C. Histochemical analysis of MCGGAIL-GUS in barley flag leaf material in response to drought stress.** Drought = 7 days without watering. Error bars indicate SEM.

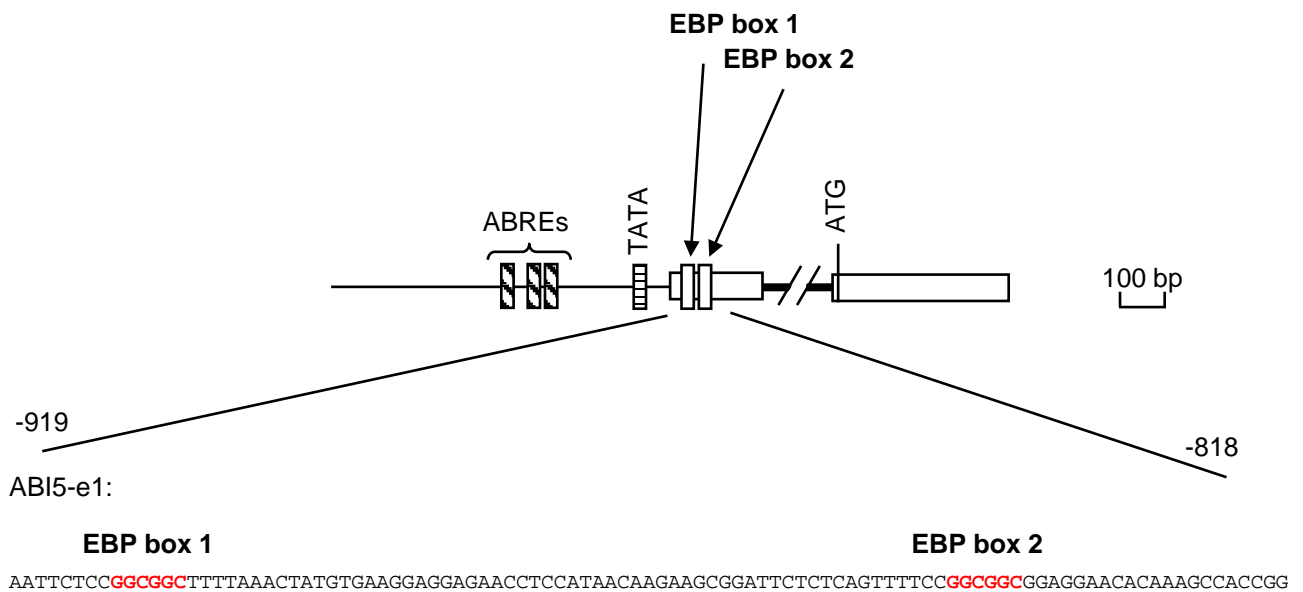

**Figure S3, Related to Figure 3.**

**A. Overlap of BRM interaction site and ERFVII binding sites in the Arabidopsis ABI5 promoter.** ABI5-e1 taken from [S1]

**Supplemental References:**

S1. Han, S.K., Sang, Y., Rodrigues, A., BIO425F2010, Wu, M.F., Rodriguez, P.L., and Wagner, D. (2012). The SWI2/SNF2 Chromatin Remodeling ATPase BRAHMA Represses Abscisic Acid Responses in the Absence of the Stress Stimulus in Arabidopsis. *Plant Cell* 24, 4892-4906.
